# Supplementary material for: Amplification-free library preparation with SAFE Hi-C uses ligation products for deep sequencing to improve traditional Hi-C analysis
Source: PubMed Central journal article supplement (PMC6642088; doi:10.1038/s42003-019-0519-y), 2019-07-19
Supplement: 42003_2019_519_MOESM1_ESM.pdf [file 42003_2019_519_MOESM1_ESM.pdf]

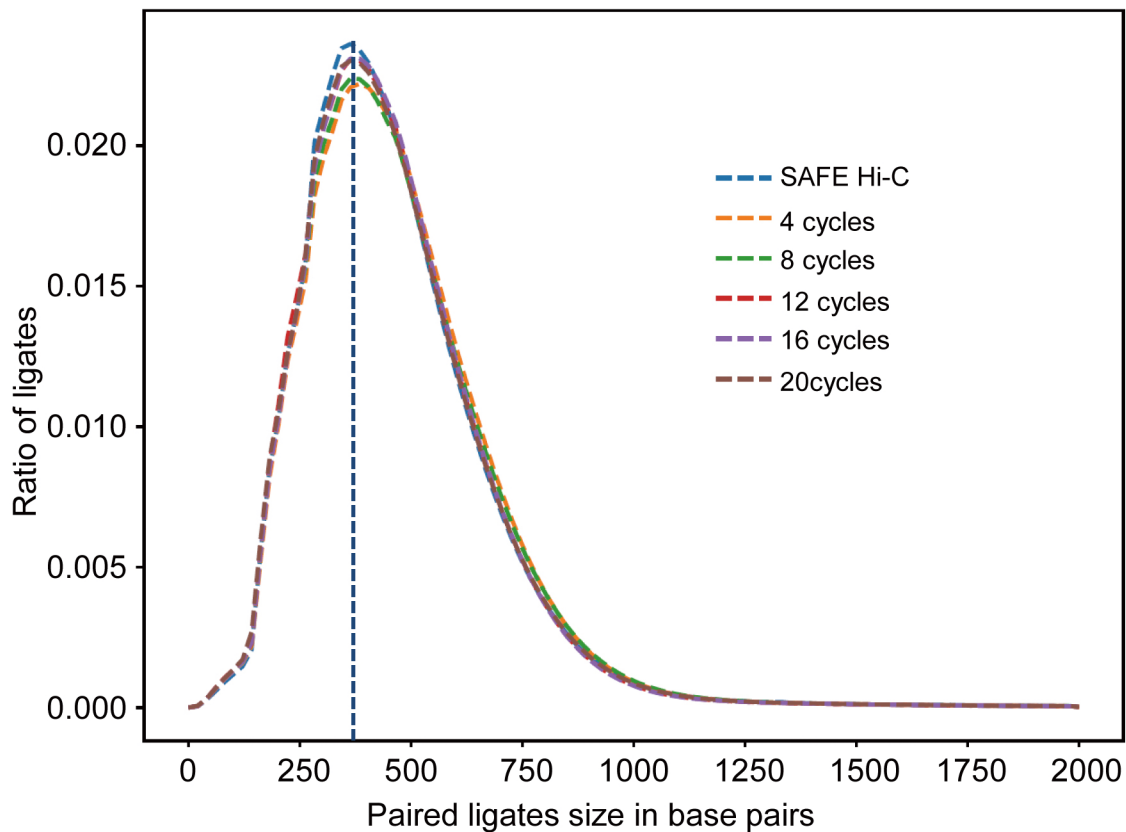

**Supplementary Fig. 1.** Size distribution of ligation products from Hi-Cs on *Drosophila* S2. Size was calculated based on the distance of each end of a paired read to the closest DpnII site.

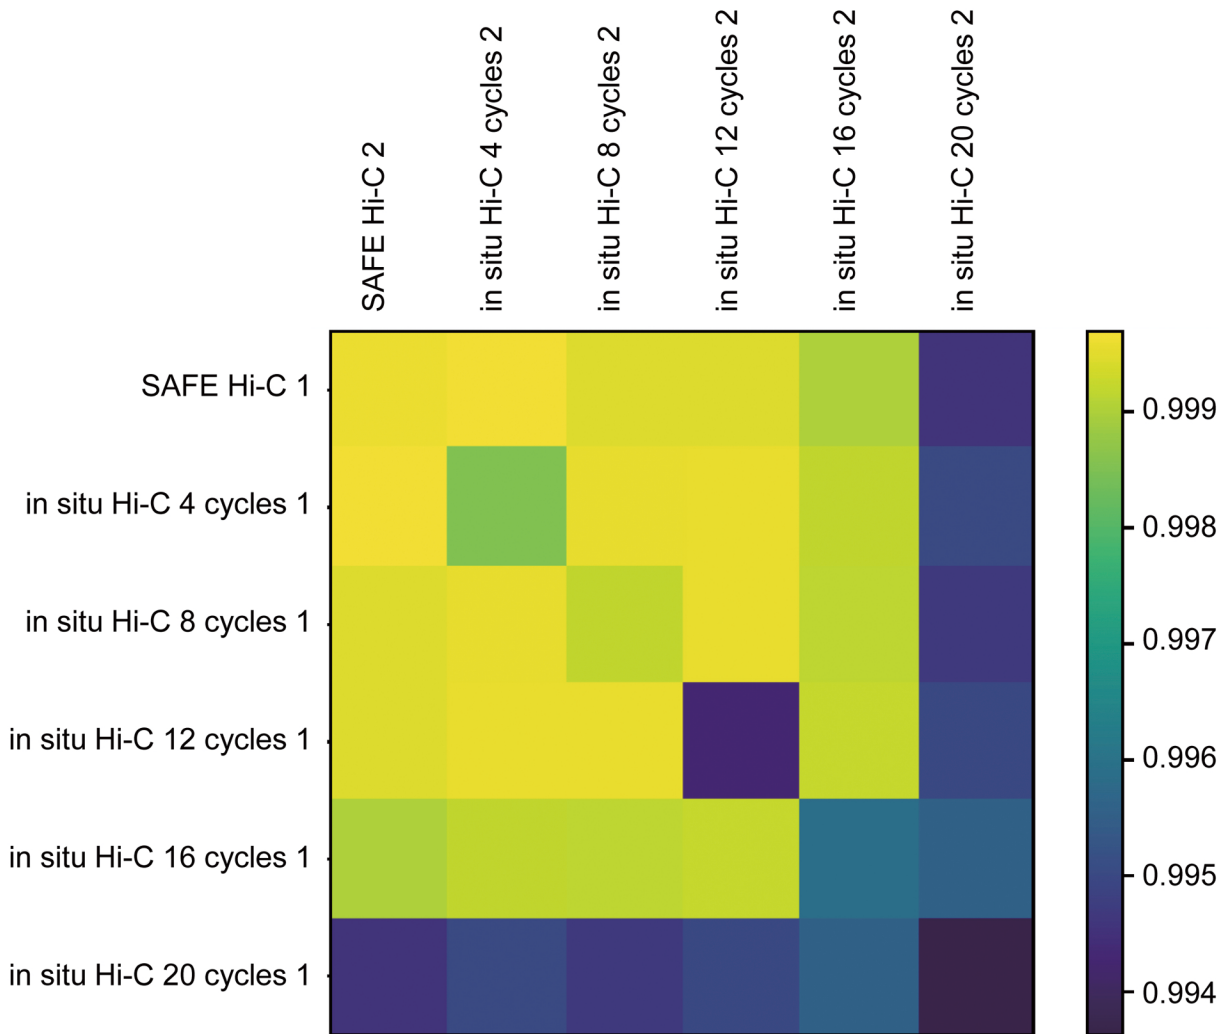

**Supplementary Fig. 2.** Stratum-adjusted correlation coefficients for biological duplicates of SAFE Hi-C and *in situ* Hi-C libraries amplified by different number of cycles for *Drosophila* S2.



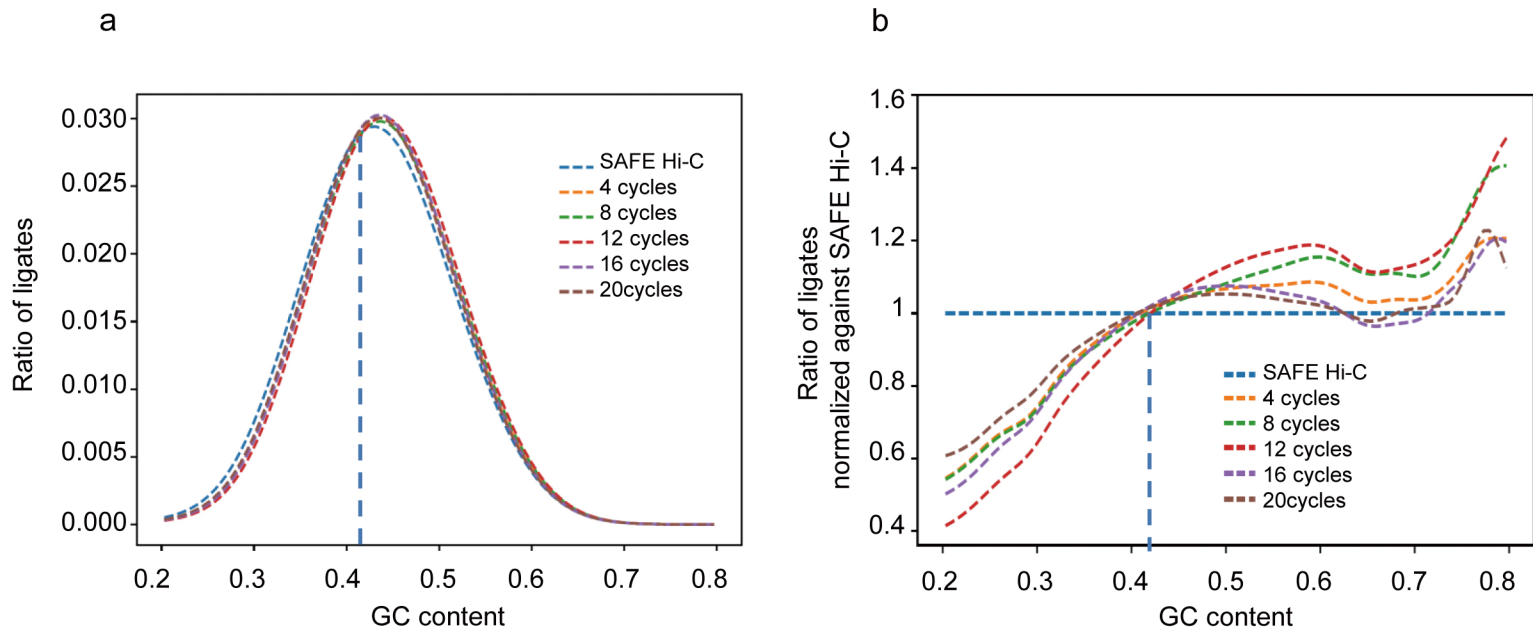

**Supplementary Fig. 3.** Amplification effect on paired reads of different GC content.

Paired reads with GC content from 20%-80% were equally divided into 100 equal bins.

(a). Ratio of paired reads as a function of GC content for SAFE Hi-C and in situ Hi-C libraries amplified for different number of cycles. Ratio is the number of paired reads over the number of total paired reads in each specific bin.

(b). Ratio of paired reads was normalized against SAFE Hi-C.

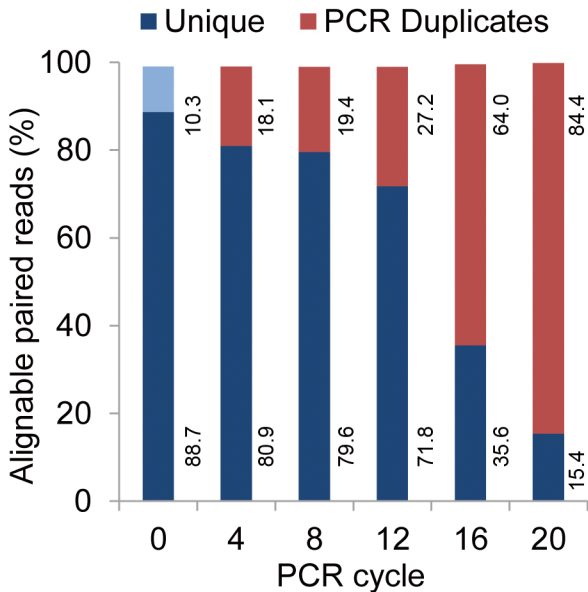

**Supplementary Fig. 4.** Percentage of unique paired reads and duplicates of the total alignable paired reads. The light blue bar shows the duplicates in SAFE Hi-C library that we kept.

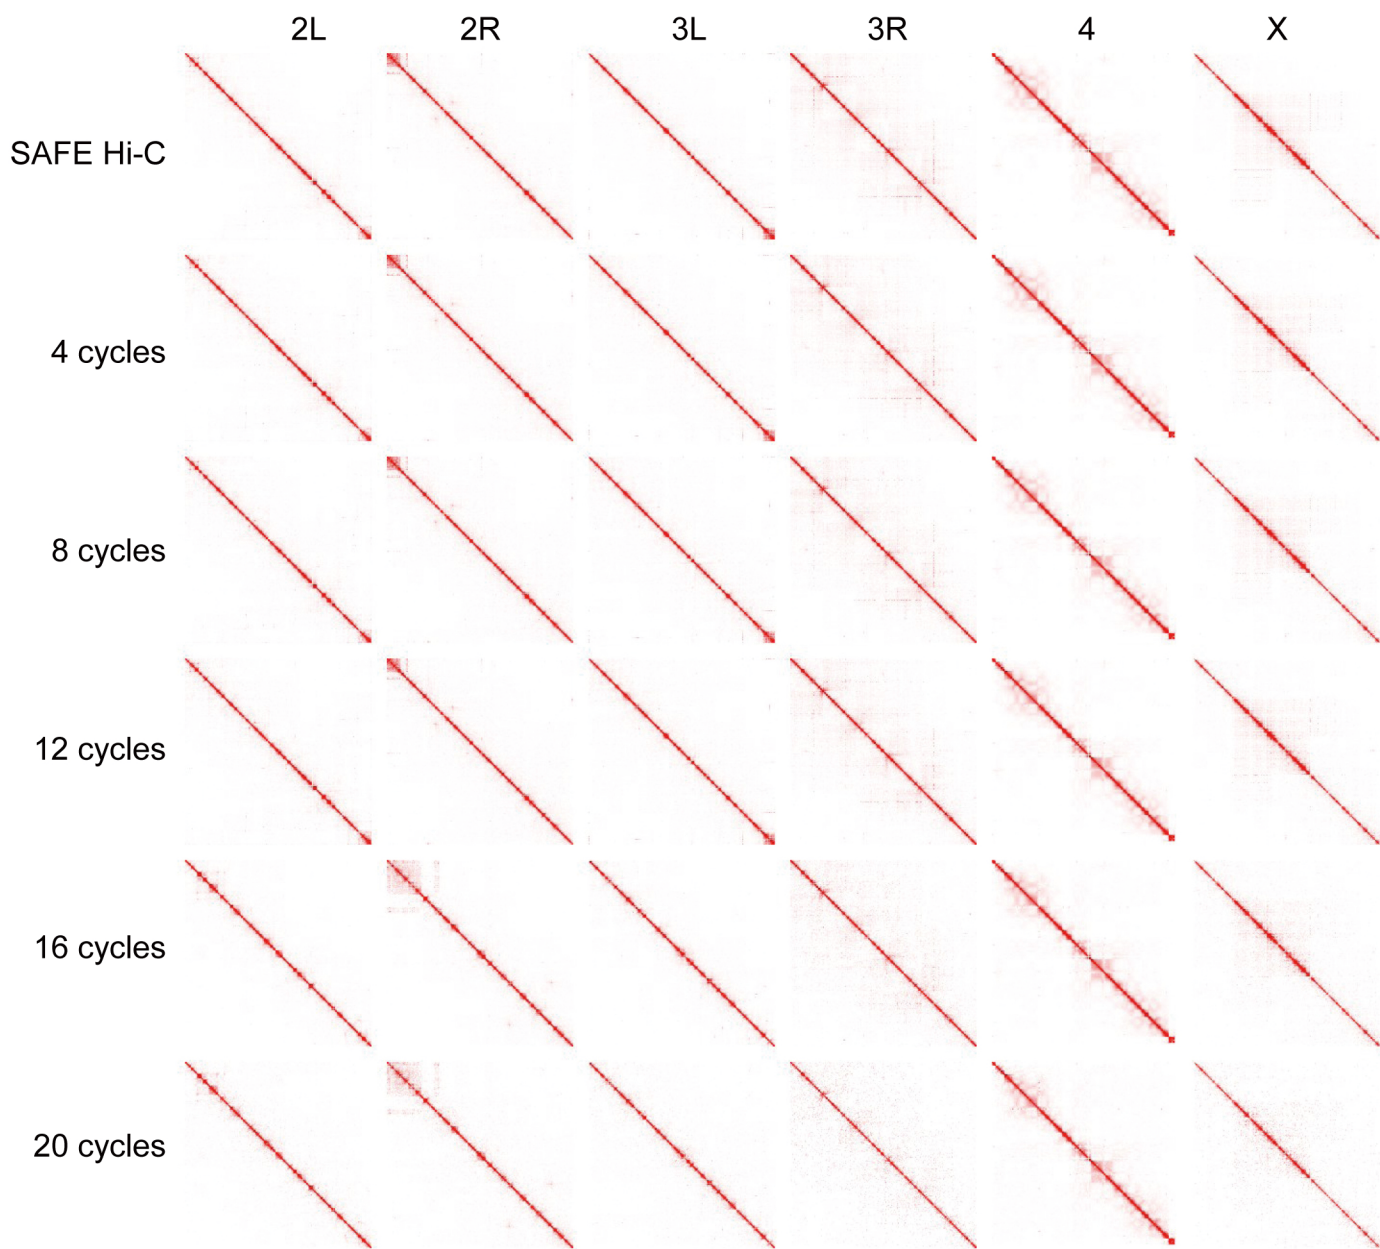

**Supplementary Fig. 5.** 5 kb resolution heatmaps for each chromosome arm of *Drosophila* S2 genome.



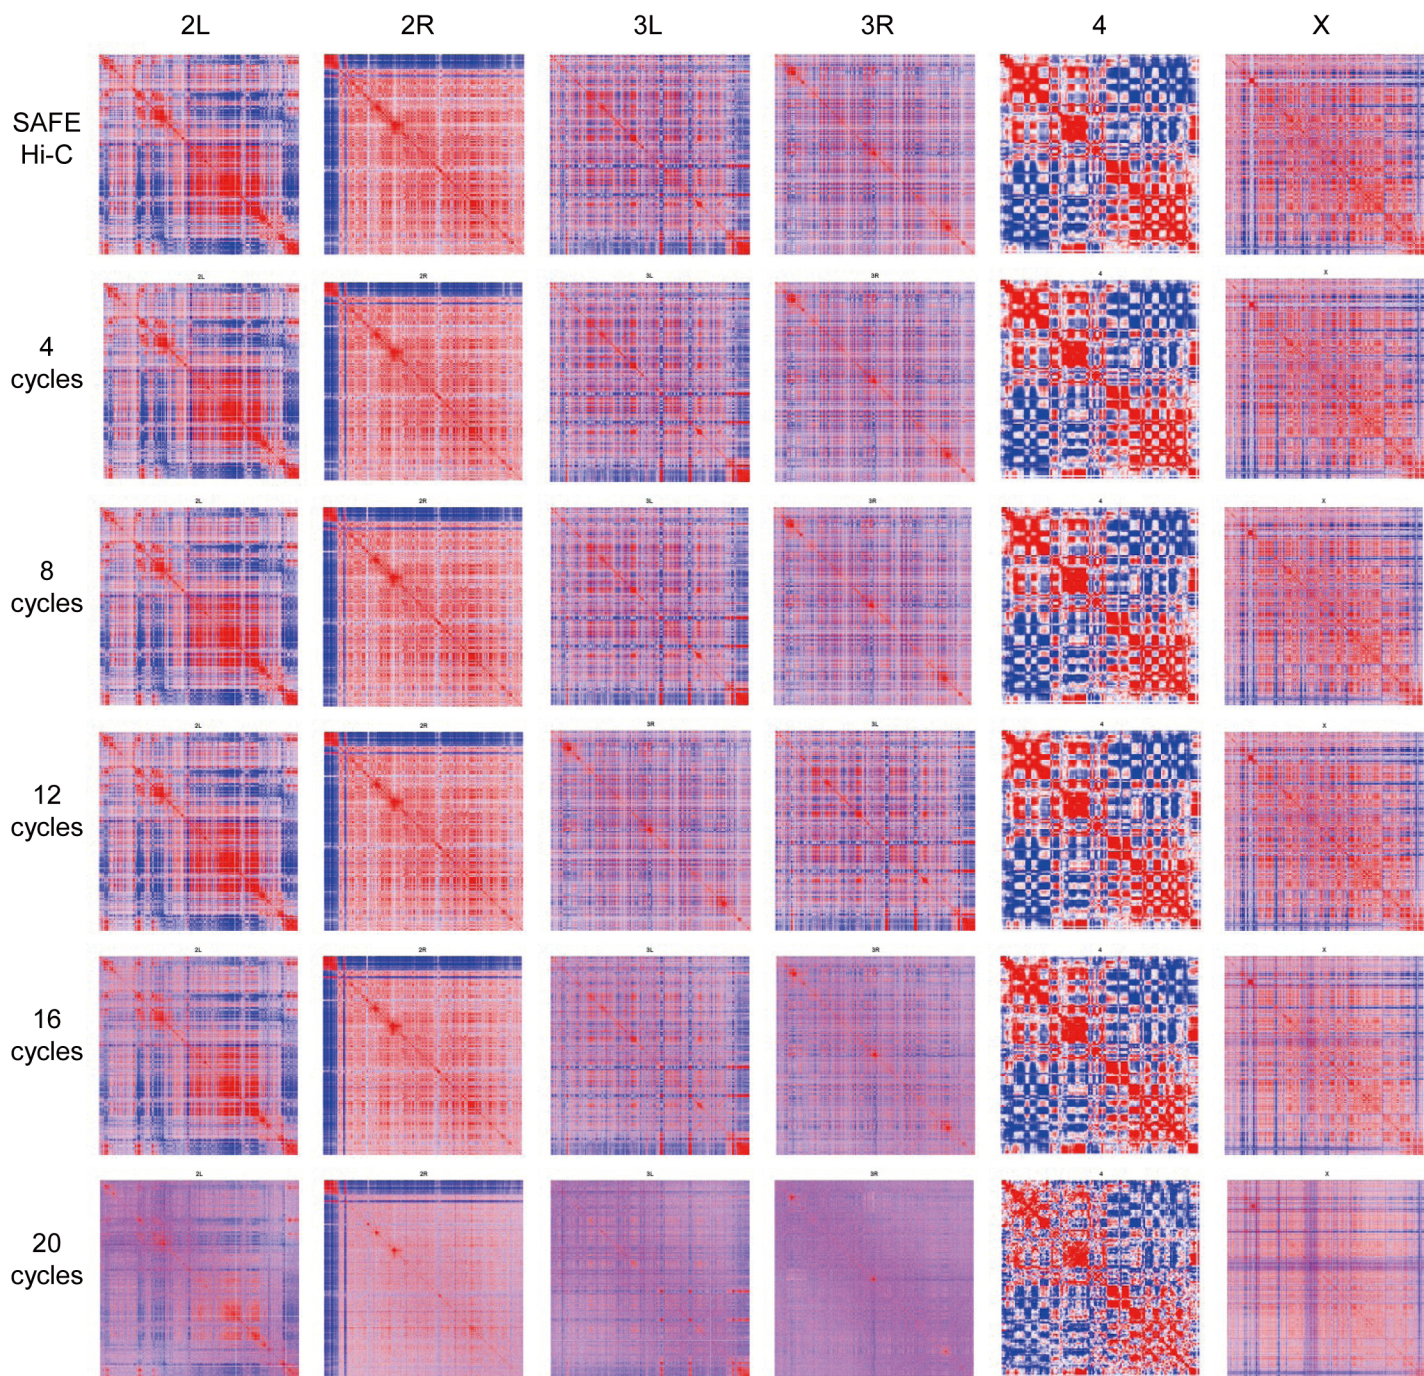

**Supplementary Fig. 6.** 10 kb resolution compartments for each chromosome arm of *Drosophila S2* genome.

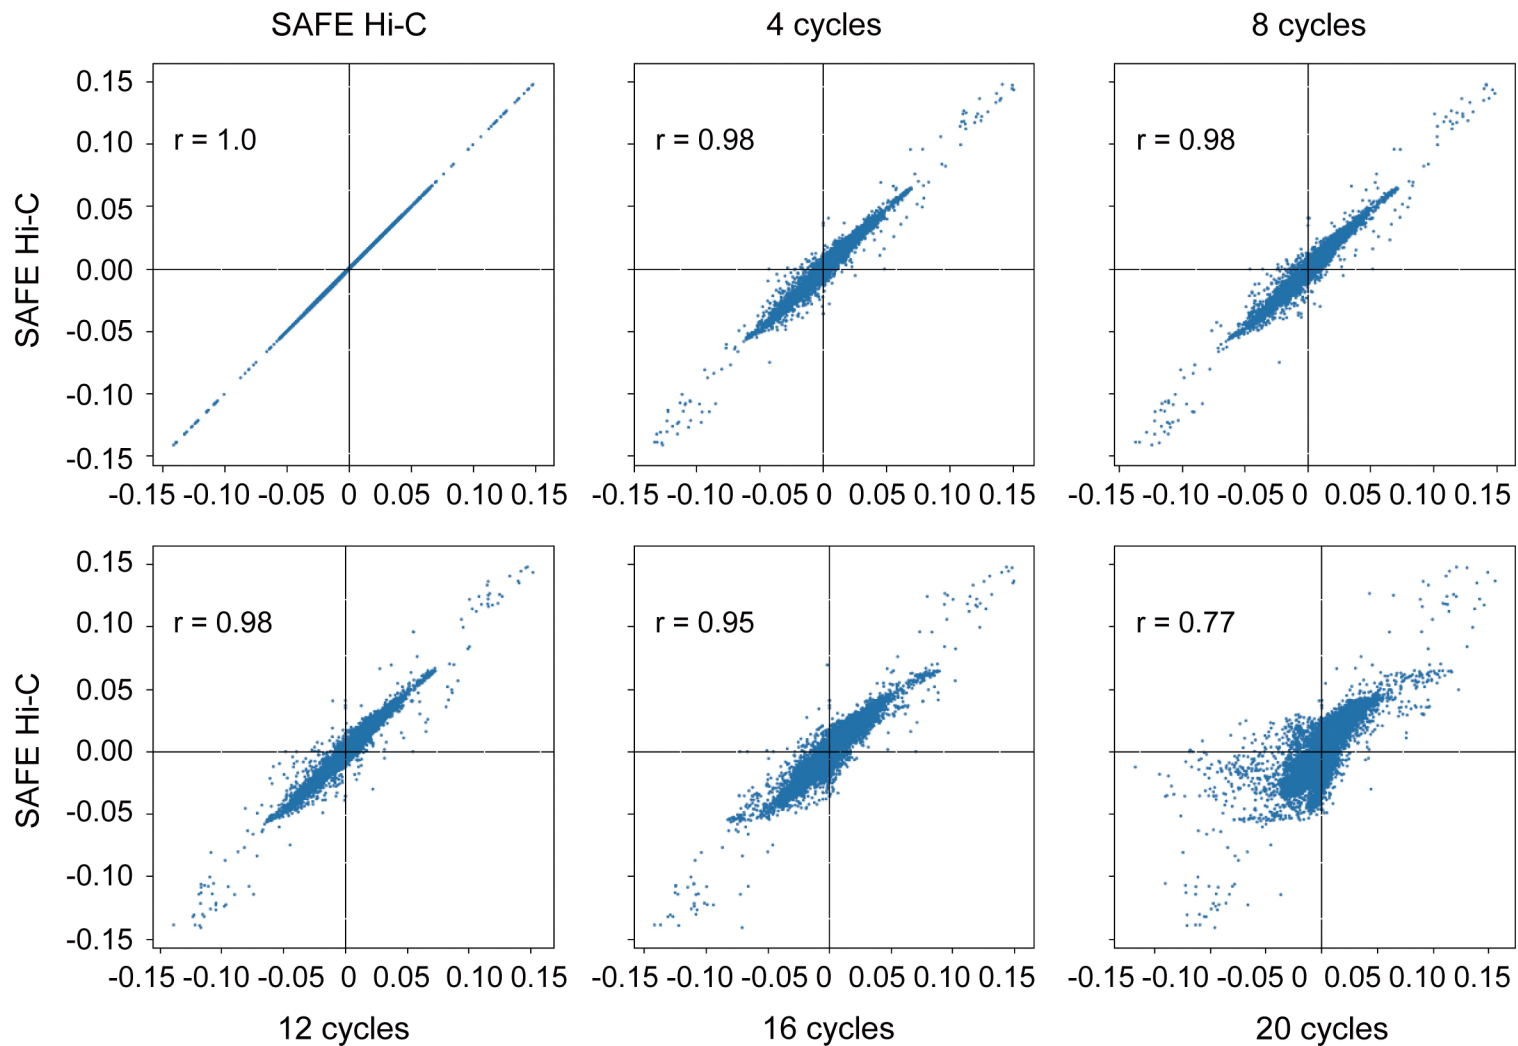

**Supplementary Fig. 7.** Pearson's correlation analysis of compartment eigenvalues of SAFE Hi-C and amplified Hi-Cs for *Drosophila* S2 cells.

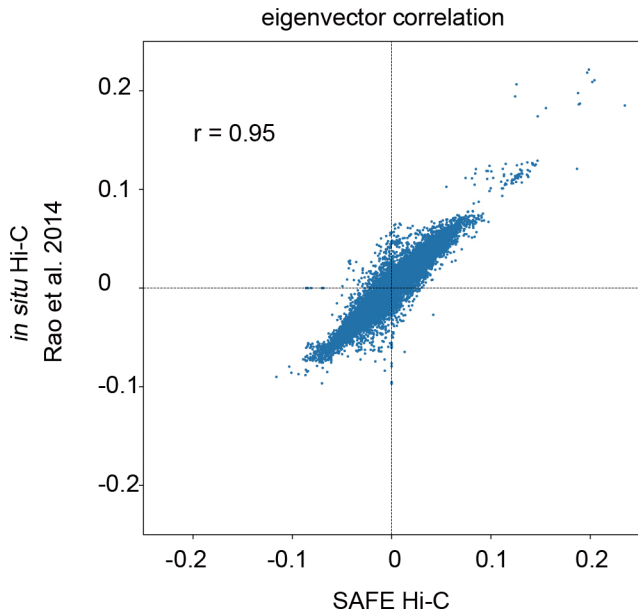

**Supplementary Fig. 8.** Pearson's correlation analysis of compartment eigenvectors of SAFE Hi-C and *in situ* Hi-C for human K562 cells.



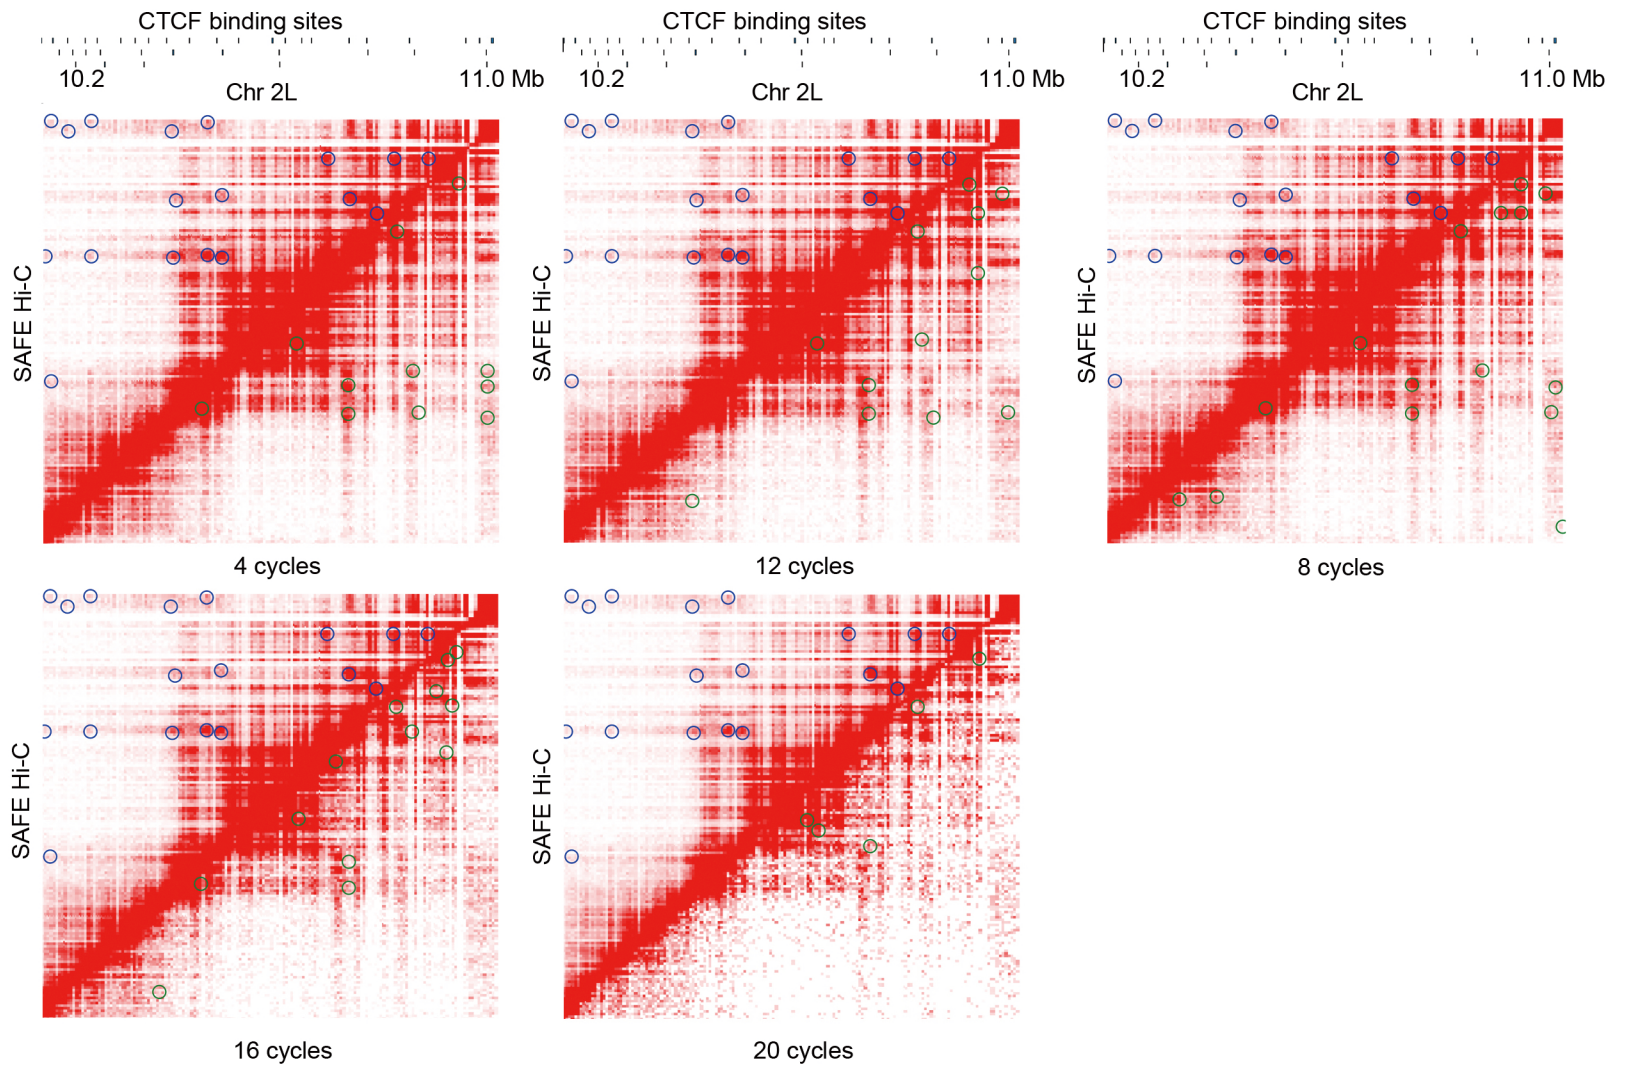

**Supplementary Fig. 9.** Examples of long-range chromatin loops identified in the region between 10.2Mb–11.0 Mb on the Chr 2L of the *Drosophila* genome by SAFE Hi-C and amplified Hi-Cs. Loops identified for SAFE Hi-C and amplified Hi-Cs are shown in blue and green circles, respectively. Short vertical lines above heatmaps indicate CTCF binding sites. *Drosophila* S2 CTCF binding sites were downloaded from modENCODE.

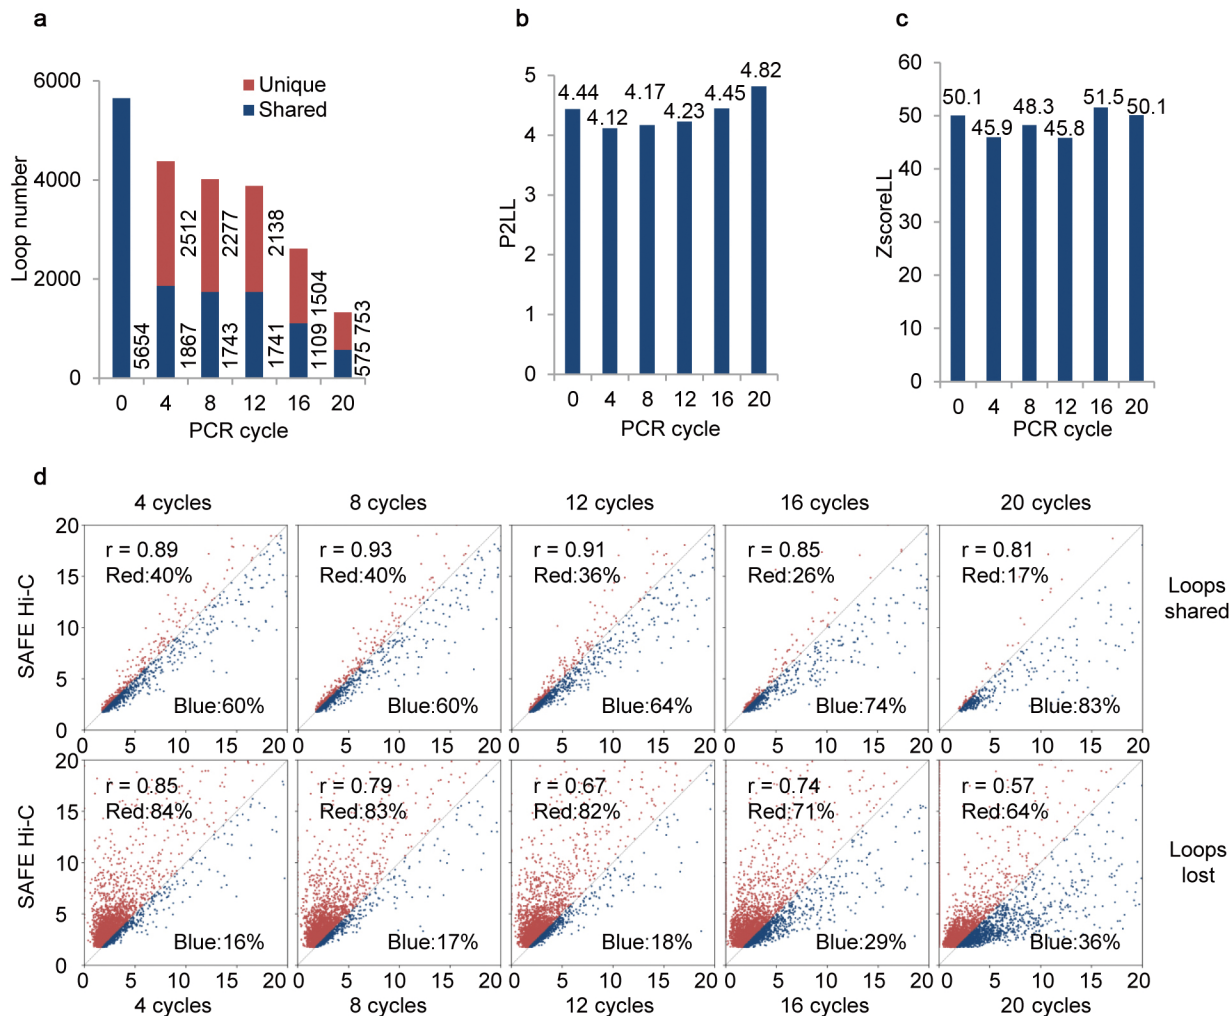

**Supplementary Fig. 10.** Comparison of long-range chromatin interactions r loops identified in the *Drosophila* genome by SAFE Hi-C and amplified libraries.

(a). Number of long-range chromatin interaction loops. Dark blue bars show the number of loops shared with SAFE Hi-C, red bars show the number of loops uniquely found for amplified Hi-Cs.

(b). Average signal-to-noise values. P2LL was calculated as described<sup>1</sup>.

(c). Average ZscoreLL for identified chromatin loops. ZscoreLL was calculated as described<sup>1</sup>.

(d). P2LL correlation between loops shared and loops found in SAFE Hi-C but lost after amplification.

Red and blue dots show loops with increased or reduced P2LL values after amplification.



|                         |                                                                     |
|-------------------------|---------------------------------------------------------------------|
| <b>SHORT Y-Adaptor:</b> |                                                                     |
| sY-Adaptor-F:           | 5'piGATCGGAAGAGCACACGTCTGAACTCCAGTCAC3'                             |
| sY-Adaptor-R:           | 5'TACTACTCTTTCCCTACACGACGCTCTTCCGATCT3'                             |
|                         |                                                                     |
| <b>FULL Y-Adaptor:</b>  |                                                                     |
| fY-Adaptor-F:           | 5'AATGATACGGCGACCACCGAGATCTACTACTCTTTCCCTACACGACGCTCTTCCGATCT3'     |
| fY-Adaptor-R:           | 5'GATCGGAAGAGCACACGTCTGAACTCCAGTCACATCACGATCTCGTATGCCGTCTTCTGCTTG3' |
|                         |                                                                     |
| <b>PCR primer:</b>      |                                                                     |
| Universal primer 1.0:   | 5'AATGATACGGCGACCACCGAGATCTACTACTCTTTCCCTACACGAC3'                  |
| Index primer 1.0:       | 5'CAAGCAGAAGACGGCATACGAGAT/CGTGATGT/GACTGGAGTTCAGACGT3'             |

**Supplementary Table 1.** List of adaptors and primer sequences.

|                             | SAFER Hi-C           | in situ Hi-C 4 cycles | in situ Hi-C 8 cycles | in situ Hi-C 12 cycles | in situ Hi-C 16 cycles | in situ Hi-C 20 cycles |
|-----------------------------|----------------------|-----------------------|-----------------------|------------------------|------------------------|------------------------|
| Sequenced Read Pairs        | 443,161,104          | 322,561,216           | 290,181,793           | 305,911,699            | 311,416,275            | 325,737,701            |
| Normal Paired               | 190,828,243          | 139,965,592           | 124,672,768           | 128,887,142            | 132,354,738            | 136,207,715            |
| Chimeric Paired             | 147,261,678          | 105,612,129           | 95,477,326            | 103,429,671            | 105,371,575            | 111,731,045            |
| Chimeric Ambiguous          | 79,030,016           | 59,772,203            | 54,624,219            | 58,129,188             | 57,940,532             | 61,604,888             |
| Unmapped                    | 26,041,167           | 17,211,292            | 15,407,480            | 15,465,698             | 15,749,430             | 16,194,053             |
| Ligation Motif Present      | 338,736,272          | 247,368,370           | 223,871,283           | 240,316,348            | 243,927,225            | 258,406,662            |
| Alignable                   | 338,089,921          | 245,577,721           | 220,150,094           | 232,316,813            | 237,726,313            | 247,938,760            |
| Unique Reads                | 299,929,328          | 198,866,672           | 175,272,581           | 166,734,491            | 84,573,363             | 38,180,490             |
| PCR Duplicates              | 35,059,438           | 44,414,379            | 42,724,700            | 63,300,068             | 152,094,594            | 209,367,729            |
| Optical Duplicates          | 3101155              | 2,296,670             | 2,152,813             | 2,282,254              | 1,058,356              | 390,541                |
| Library Complexity Estimate | 1484609396           | 581922523             | 480376696             | 336812519              | 91405541               | 38229560               |
| Intra-fragment Reads        | 8,188,657(2.44%)     | 2,992,149(1.61%)      | 2,668,207(1.63%)      | 2,478,636(1.59%)       | 1,071,523(1.35%)       | 348,989(0.97%)         |
| Below MAPQ Threshold        | 81,242,399(24.25%)   | 45,850,518(24.68%)    | 40,713,164(24.85%)    | 41,046,284(26.40%)     | 34,234,664(43.09%)     | 23,081,100(64.30%)     |
| Hi-C Contacts               | 245,557,710(73.30%)  | 136,912,869(73.71%)   | 120,467,844(73.52%)   | 111,942,174(72.00%)    | 44,151,206(55.57%)     | 12,467,140(34.73%)     |
| Ligation Motif Present      | 131,525,095 (39.26%) | 69,971,976 (37.67%)   | 62,100,601 (37.90%)   | 58,626,298 (37.71%)    | 23,101,358 (29.07%)    | 6,361,221 (17.72%)     |
| 3' Bias (Long Range)        | 70% - 30%            | 69% - 31%             | 69% - 31%             | 70% - 30%              | 70% - 30%              | 70% - 30%              |
| Pair Type %(L-I-O-R)        | 25%-25%-25%-25%      | 25%-25%-25%-25%       | 25%-25%-25%-25%       | 25%-25%-25%-25%        | 25%-25%-25%-25%        | 25%-25%-25%-25%        |
| Inter-chromosomal           | 16,991,943 (5.07%)   | 9,645,911 (5.19%)     | 8,451,464 (5.16%)     | 7,816,689 (5.03%)      | 3,111,425 (3.92%)      | 909,767 (2.53%)        |
| Intra-chromosomal           | 228,565,767 (68.23%) | 127,266,958 (68.51%)  | 112,016,380 (68.37%)  | 104,125,485 (66.98%)   | 41,039,781 (51.65%)    | 11,557,373 (32.20%)    |
| Short Range (<20Kb)         | 119,803,473 (35.76%) | 62,999,574 (33.92%)   | 55,897,678 (34.12%)   | 52,279,252 (33.63%)    | 20,977,475 (26.40%)    | 6,029,361 (16.80%)     |
| Long Range (>20Kb)          | 108,745,026 (32.46%) | 64,258,102 (34.59%)   | 56,110,760 (34.25%)   | 51,838,856 (33.34%)    | 20,059,291 (25.25%)    | 5,527,110 (15.40%)     |

Supplementary Table 2. Libraries sequencing statistics for *Drosophila* S2 cells.

|                        | SAFE Hi-C             | <i>in situ</i> Hi-C replicates<br>( <i>Rao et al.</i> ) |
|------------------------|-----------------------|---------------------------------------------------------|
| Sequenced Read Pairs   | 120,626,961           | 118,785,918                                             |
| Unmapped               | 710948 (0.59%)        | 6,608,116 (5.56%)                                       |
| Ligation Motif Present | 82791402 (68.63%)     | 24,214,726 (20.39%)                                     |
| Alignable              | 106762759 (88.51%)    | 110,343,831 (92.89%)                                    |
| Unique Reads           | 86056230 (71.34%)     | 109848235 (92.48%)                                      |
| Intra-fragment Reads   | 1,539,033 (1.28% )    | 341,252 (0.29%)                                         |
| Below MAPQ Threshold   | 7,896,573 (6.55%)     | 19,893,772 (16.75%)                                     |
| Hi-C Contacts          | 105560358 (87.51%)    | 89,613,211 (75.44%)                                     |
| Ligation Motif Present | 34,795,109 (28.85%)   | 13,520,105 (11.38%)                                     |
| 3' Bias (Long Range)   | 69% - 31%             | 68% - 32%                                               |
| Pair Type %(L-I-O-R)   | 25% - 25% - 25% - 25% | 25% - 25% - 25% - 25%                                   |
| Inter-chromosomal      | 11,756,385 (9.75%)    | 32,269,075 (27.17%)                                     |
| Intra-chromosomal      | 64,864,239 (53.77%)   | 57,344,136 (48.28%)                                     |
| Short Range (<20Kb)    | 23,669,261 (19.62%)   | 10,121,516 (8.52%)                                      |
| Long Range (>20Kb)     | 41,194,674 (34.15%)   | 47,222,552 (39.75%)                                     |

**Supplementary Table 3.** SAFE Hi-C and *in situ* Hi-C sequencing statistics for human K562 cells.

**Reference:**

Rao, S. S. *et al.* A 3D map of the human genome at kilobase resolution reveals principles of chromatin looping. *Cell* **159**, 1665-1680, doi:10.1016/j.cell.2014.11.021 (2014).
